# Supplementary material for: Development and Validation of a Prediction Model for Chronic Postsurgical Pain in Distal Lower Limb Fracture Patients: A Retrospective Cohort Study
Source: Research Square preprint supplement (doi:10.21203/rs.3.rs-5807228/v1), 2025-01-20

**Table S1.** Baseline Characteristics of Patients in the Development and Validation Cohorts

| Variables | Development cohort (n=571) | | P | Validation cohort (n=247) | | P |
| --- | --- | --- | --- | --- | --- | --- |
| **Non-CPSP** | **CPSP** | **Non-CPSP** | **CPSP** |
| Age | 37.00  (25.50~53.00) | 35.00  (26.00~48.00) | 0.700 | 34.50  (26.00~50.00) | 42.00  (31.00~55.00) | 0.017 |
| Sex |  |  | 0.747 |  |  | 0.934 |
| Male | 188(53.41) | 120(54.7) |  | 92(60.53) | 58(61.05) |  |
| Female | 164(46.59) | 99(45.21) |  | 60(39.47) | 37(38.95) |  |
| BMI | 24.00  (21.00~28.00) | 24.00  (21.00~28.00) | 0.478 | 24.00  (20.00~27.00) | 24.00  (22.00~29.00) | 0.125 |
| Smoking status |  |  | 0.392 |  |  | 0.008 |
| No | 273(77.56) | 163(74.43) |  | 121(79.61) | 61(64.21) |  |
| Yes | 79(22.44) | 56(25.57) |  | 31(20.39) | 34(35.79) |  |
| Alcohol consumption |  |  | 0.221 |  |  | 0.257 |
| No | 264(75.00) | 174(79.45) |  | 112(73.68) | 76(80.00) |  |
| Yes | 88(25.00) | 45(20.55) |  | 40(26.32) | 19(20.00) |  |
| Prior chronic pain condition |  |  | 0.062 |  |  | 0.394 |
| No | 286(81.25) | 191(87.21) |  | 134(88.16) | 87(91.58) |  |
| Yes | 66(18.75) | 28(12.79) |  | 18(11.84) | 8(8.42) |  |
| Anesthesia type |  |  | 0.008 |  |  | 0.068 |
| Spinal | 316(89.77) | 210(95.89) |  | 138(90.79) | 92(96.84) |  |
| General | 36(10.23) | 9(4.11) |  | 14(9.21) | 3(3.16) |  |
| Regular analgaesia use pre-injury |  |  | 0.537 |  |  | 0.312 |
| No | 339(96.31) | 213(97.26) |  | 151(99.34) | 93(97.89) |  |
| Yes | 13(3.69) | 6(2.74) |  | 1(0.66) | 2(2.11) |  |
| Injury mechanism |  |  | 0.050 |  |  | 0.766 |
| Low energy | 263(74.72) | 147(67.12) |  | 113(74.34) | 69(72.63) |  |
| High energy | 89(25.28) | 72(32.88) |  | 39(25.66) | 26(27.37) |  |
| PCS | 20.00  (10.00~32.00) | 37.00  (31.00~43.00) | <0.001 | 21.00  (11.50~30.00) | 36.00  (31.00~42.00) | 0.000 |
| Surgery site |  |  | <0.001 |  |  | 0.001 |
| Unimalleolar | 86(24.43) | 29(13.24) |  | 36(23.68) | 19(20.00) |  |
| Bimalleolar | 46(13.07) | 27(12.33) |  | 20(13.16) | 9(9.47) |  |
| Trimalleolar | 42(11.94) | 21(9.59) |  | 19(12.51) | 1(1.05) |  |
| Fibular | 30(8.52) | 21(9.59) |  | 9(5.92) | 5(5.26) |  |
| Tibial | 96(27.27) | 65(29.68) |  | 46(30.26) | 37(38.95) |  |
| Tibiofibular | 52(14.77) | 56(25.57) |  | 22(14.47) | 24(25.27) |  |
| Interval between injury and visit | 6.00  (3.00~12.00) | 6.00  (2.00~10.00) | 0.259 | 6.00  (2.00~10.00) | 6.00  (2.00~13.00) | 0.256 |
| Interval between injury and surgery | 4.00  (3.00~5.00) | 4.00  (3.00~6.00) | 0.481 | 3.00  (2.00~5.00) | 4.00  (3.00~5.00) | 0.147 |
| NRS at the time of visit | 8.00  (7.00~9.00) | 9.00  (8.00~10.00) | 0.000 | 8.00  (7.00~9.00) | 9.00  (8.00~10.00) | 0.000 |
| NRS on the day of surgery | 4.50  (4.00~6.00) | 5.00  (4.00~6.00) | 0.055 | 5.00  (4.00~6.00) | 5.00  (4.00~6.00) | 0.704 |
| NRS on 1 days after surgery | 3.00  (2.00~4.00) | 4.00  (2.00~5.00) | 0.001 | 3.00  (2.00~4.00) | 3.00  (2.00~5.00) | 0.187 |
| NRS at discharge | 2.00  (1.00~3.00) | 2.00  (1.00~3.00) | 0.009 | 1.00  (1.00~2.00) | 2.00  (1.00~4.00) | 0.012 |
| Postoperative analgesia technique |  |  | 0.075 |  |  | 0.728 |
| 0：PCIA | 121(34.38) | 53(24.20) |  | 47(30.92) | 31(32.63) |  |
| 1：Opioid alone | 127(36.08) | 98(44.75) |  | 69(45.39) | 44(46.32) |  |
| 2：NSAIDS | 85(24.15) | 59(26.94) |  | 29(19.08) | 17(17.89) |  |
| 3：0+1/2 | 18(5.11) | 9(4.11) |  | 4(2.63) | 3(3.16) |  |
| 4：None | 1(0.28) | 0(0.00) |  | 3(1.97) | 0(0.00) |  |
| Fixation type |  |  | <0.001 |  |  | 0.001 |
| Nail | 94(26.70) | 51(23.29) |  | 36(23.68) | 23(24.21) |  |
| Plate and screws | 38(10.80) | 27(12.33) |  | 12(7.89) | 5(5.26) |  |
| Both | 169(48.01) | 136(62.10) |  | 83(54.61) | 67(70.53) |  |
| Others | 51(14.49) | 5(2.28) |  | 21(13.82) | 0(0.00) |  |
| Fracture surgical wound location |  |  | 0.547 |  |  | 0.318 |
| Lateral | 104(29.55) | 61(27.85) |  | 48(31.58) | 23(24.21) |  |
| Anterior | 122(34.66) | 76(34.70) |  | 47(30.92) | 25(26.32) |  |
| Medial | 55(15.63) | 28(12.79) |  | 22(14.47) | 18(18.95) |  |
| Other | 71(20.17) | 54(24.66) |  | 35(23.03) | 29(30.53) |  |
| Incision size | 8.00  (4.91~12.69) | 8.00  (3.03~14.00) | 0.762 | 8.00  (3.99~12.02) | 8.00  (2.00~12.00) | 0.725 |
| Preoperative clinical managements |  |  | <0.001 |  |  | 0.661 |
| 0：None | 168(47.73) | 92(42.01) |  | 72(47.37) | 44(46.32) |  |
| 1：Drugs | 117(33.24) | 111(50.68) |  | 63(41.45) | 43(45.26) |  |
| 2：Cryotherapy | 45(12.78) | 14(6.39) |  | 15(9.87) | 8(8.42) |  |
| 3：Drugs+ Cryotherapy | 22(6.25) | 2(0.91) |  | 2(1.32) | 0(0.00) |  |
| Pre-WBC | 8.13  (6.54~11.30) | 8.06  (6.07~10.37) | 0.209 | 8.06  (6.20~10.68) | 8.20  (6.55~9.83) | 0.785 |
| Pre-NLR | 2.41(  1.68~3.44) | 2.35  (1.72~3.22) | 0.582 | 2.40  (1.68~3.51) | 2.44  (1.78~3.33) | 0.915 |
| Pre-CRP | 9.31  (5.55~16.80) | 10.00  (5.40~16.40) | 0.876 | 9.77  (6.09~14.53) | 9.70(  4.90~16.30) | 0.846 |
| Pre-ALB | 42.30  (35.40~49.05) | 45.10  (40.20~51.00) | 0.001 | 42.80  (35.45~49.50) | 44.60  (40.60~51.50) | 0.120 |
| Pre- Calcium | 2.47  (2.22~2.72) | 2.50  (2.20~2.73) | 0.650 | 2.36  (2.14~2.71) | 2.41  (2.23~2.65) | 0.350 |

**Note:** Values are n (%) or mean ± SD or median (quartile); Abbreviations: Pain Catastrophizing Scale (PCS); Patient-controlled intravenous analgesia (PCIA); Non-steroidal anti-inflammatory drug (NSAIDS); Preoperative white blood cell count (Pre- WBC); The neutrophil-to-lymphocyte ratio (NLR); C-reactive protein (CPR); albumin (ALB).

**Table S2.** Variance inflation factors and tolerances of variables

| Variables | t | P | VIF |
| --- | --- | --- | --- |
| Surgery site | 0.587 | 0.557 | 1.347 |
| Postoperative analgesia technique | 1.603 | 0.110 | 1.103 |
| Fixation type | -0.754 | 0.451 | 1.180 |
| Preoperative clinical managements | -1.742 | 0.082 | 1.020 |
| Age | 0.116 | 0.908 | 1.061 |
| PCS | 13.957 | 0.000 | 1.054 |
| Pre-ALB | 1.565 | 0.118 | 1.129 |
| NRS at the time of visit | 4.132 | 0.000 | 1.248 |
| NRS on the day of surgery | -0.270 | 0.787 | 1.207 |
| NRS on 1 days after surgery | 2.264 | 0.024 | 1.091 |

**Note:** Pain Catastrophizing Scale (PCS), albumin (ALB)

**Figure S 1.** Numbers of patients with and without CPSP in different fracture sites.

**

**

**Figure S 2.** Numbers of patients with and without CPSP in different fracture sites.


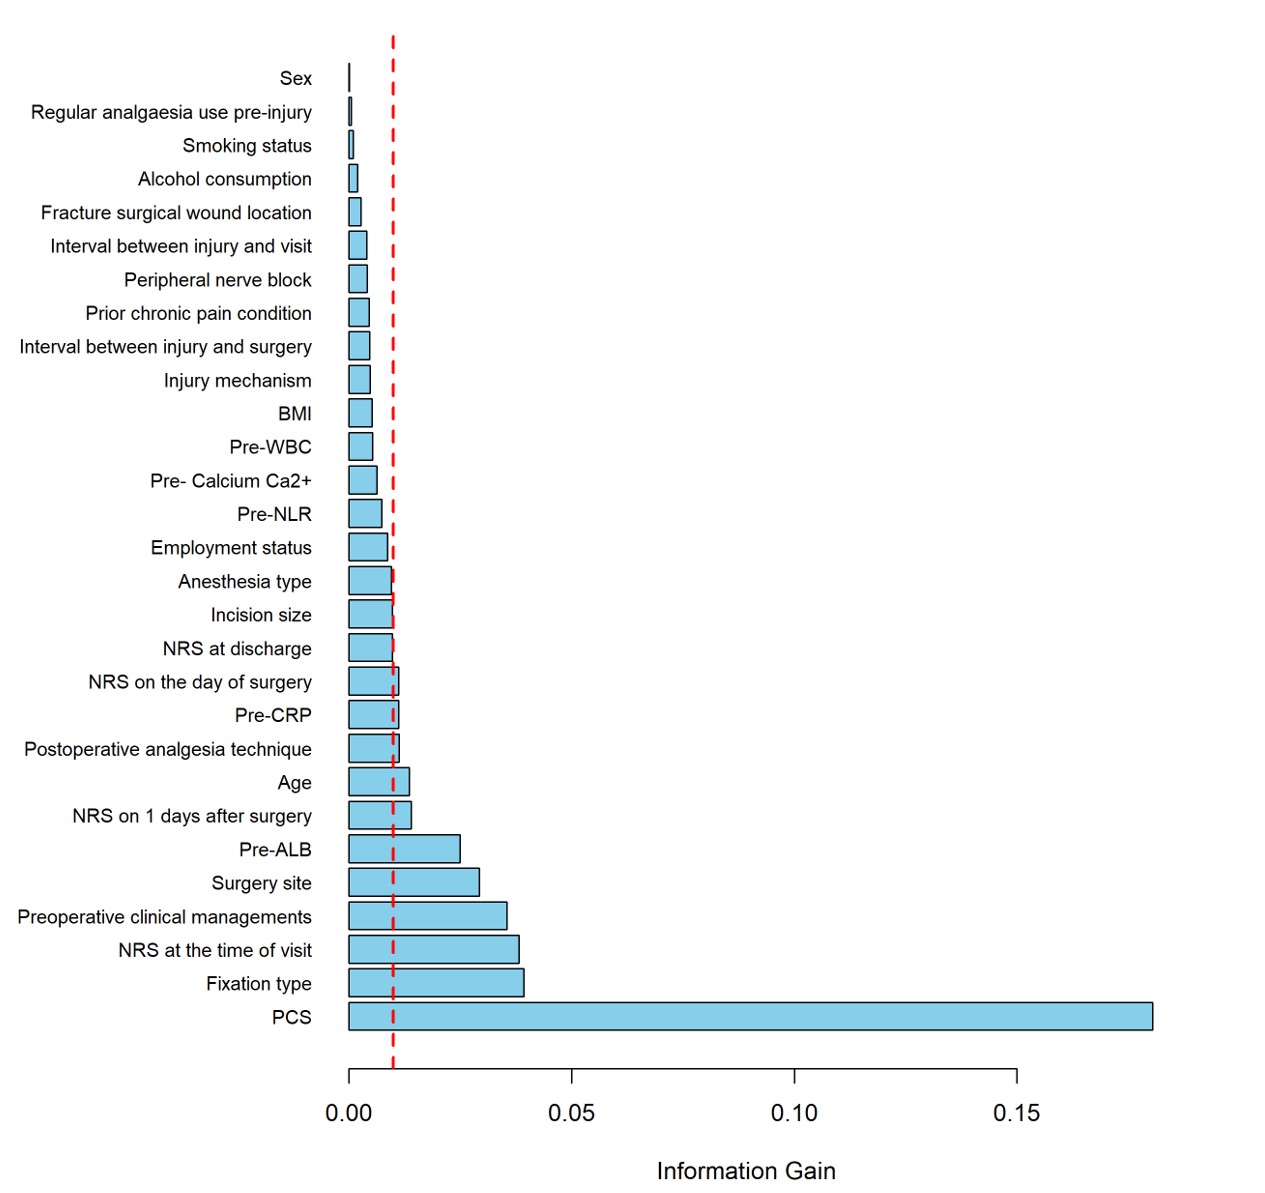

Supplement: Supplementary file 1 [file c63bbfe917490db2d5dd27d5.docx]
